1 **The second edge of ADHD: an advantage in motor learning and**  
2 **performance with task-irrelevant background vibratory noise**

3 *Maria Korman*<sup>1=</sup>, *Lian Meir-Yalon*<sup>2=</sup>, *Nebal Egbarieh*<sup>3</sup>, *Avi Karni*<sup>1,2</sup>

4

5 <sup>1</sup> The Edmond J. Safra Brain Research Center for the Study of Learning Disabilities,  
6 University of Haifa, Haifa, Israel

7

8 <sup>2</sup> Laboratory for Human Brain and Learning, Sagol Dept. of Neurobiology, University  
9 of Haifa, Haifa, Israel

10

11 <sup>3</sup>Department of Occupational Therapy, Faculty of Social Welfare & Health Sciences,  
12 University of Haifa, Israel

13

14 = Equal contribution

15 \* Corresponding author:

16 Maria Korman

17 University of Haifa

18 199 Aba Khoushy Ave. Mount Carmel,

19 Haifa

20 ISRAEL

21 [korman.maria@gmail.com](mailto:korman.maria@gmail.com)

22

23

24

25 **Conflict of interest:** The authors declare no competing financial interests.

26

27 **Abstract**

28

29 Young adults with ADHD often gain less than expected from practice sessions well-  
30 suited for their peers. Here, we tested whether task-irrelevant, low-intensity vibratory  
31 stimulation (VtSt), suggested to modulate motor learning, may compensate for such  
32 learning deficits. Participants were given training, either with or without VtSt, on a  
33 sequence of finger opposition movements. Under VtSt, typical individuals had  
34 reduced overnight, consolidation phase, gains; performance partly recovering one  
35 week later. In contrast, participants with ADHD benefitted from VtSt both during the  
36 acquisition (online) and the overnight skill consolidation (offline) phases. One week  
37 later, both groups showed robust retention of the gains in performance, but when  
38 tested with background VtSt, individuals with ADHD outperformed their typical  
39 peers. We propose that ADHD can confer advantages in performance, learning and  
40 skill memory consolidation in specific ‘noisy’ conditions that adversely affect typical  
41 adults; we conjecture that the effects of VtSt are contingent on baseline arousal levels.

42

43

44

45 **Keywords:** procedural learning, motor sequence, skill memory consolidation,  
46 ADHD, chronotype, arousal, young adults, sensory stimulation

47

48 The evidence from skill acquisition studies in people with ADHD is equivocal; some  
49 studies report deficits vis-à-vis typical controls<sup>1-3</sup> while in other tasks, participants  
50 with ADHD were as effective learners as their typical peers<sup>4,5</sup>. Repeated task  
51 performance is essential for the acquisition of daily and academic skills, but, long  
52 repetitive practice can be sub-optimal in ADHD<sup>2,6,7</sup>, presumably due to difficulties in  
53 sustaining attention<sup>8</sup>. Deficits in directing, focusing and maintaining attention<sup>9</sup> may  
54 account for the increases in error rates in ADHD<sup>1-3</sup>. Nevertheless, the learning of an  
55 implicit movement sequence (SRT task) in adults with ADHD was found intact<sup>3</sup>. In  
56 explicit learning conditions, both the acquisition and the memory consolidation phase  
57 after motor practice may be atypical in individuals with ADHD (smaller and/or slower  
58 when compared to controls), however, clear practice related gains and effective  
59 retention of the acquired skills were reported<sup>1,10</sup>.

60  
61 Brain plasticity, the basis for skill and knowledge, is a highly controlled (selective)  
62 process, mainly because of a consolidation phase, wherein structural modifications  
63 occur at brain areas engaged in task performance and in circuits wherein the memory  
64 was initially encoded during salient experiences<sup>11</sup>. In the context of skill (procedural,  
65 'how to') learning, these processes are triggered by the learning experience, if  
66 sufficient practice is afforded<sup>12</sup>. Once triggered, consolidation processes can proceed  
67 'off-line', during both wakefulness and sleep, and culminate in the establishment of  
68 new knowledge and its integration into previously existing knowledge<sup>11,13-15</sup>. This is  
69 reflected in behavior. Large gains in performance speed, with no loss of accuracy,  
70 occur early in training, within session ('fast learning', novelty, phase)<sup>15-17</sup>. However,  
71 additional robust gains in speed and accuracy can be expressed hours after the  
72 termination of training, for example by 24 hours post-training. These delayed  
73 (between-sessions, 'offline') gains in performance presumably reflect the latent  
74 neuronal long-term memory consolidation processes<sup>14,15,17-19</sup>. The performance level  
75 attained after the completion of the consolidation phase can be well retained for weeks  
76 and months<sup>15</sup>. However, the triggering or completion of a consolidation phase may  
77 fail; for example, in cases when practice is terminated too early<sup>13,20</sup> when interference  
78 by subsequent experiences takes place<sup>15,21</sup> and by poor sleep<sup>22</sup>.

79  
80 Most models of memory, at the level of brain mechanisms, focus on the neural events  
81 directly (in a causal sense) mediating memory, e.g., synaptic consolidation, and the  
82 anatomical locus of the 'memory trace' in relation to the learning experience<sup>11,23</sup>.  
83 There is, however, evidence indicating that the generation of long-term memory is  
84 modulated and controlled by factors that relate to the background brain states during  
85 and after the learning experience rather than to parameters intrinsic to the training  
86 experience per se<sup>24</sup>. Thus, processes that are in a sense orthogonal to the actual  
87 learning experience can nevertheless gate and determine long-term memory storage<sup>25</sup>.  
88 Within training and post-training treatments, pharmacological and behavioral, were  
89 shown to selectively enhance or impair memory storage in many learning tasks<sup>15,26-28</sup>.  
90 For example, minor vibrotactile or vibroauditory stimulation afforded during training  
91 may disrupt consolidation processes in healthy young adults<sup>29</sup>. Thus, the actual  
92 learning experience, while obligatory, may not by itself suffice for establishing long-  
93 term memory; control mechanisms must be satisfied before learning can be  
94 consolidated into long-term memory.

95  
96 Recently, a number of non-pharmacological interventions to up-regulate skill learning  
97 in ADHD were suggested. One line of evidence suggests that some of the relative

98 learning deficits in persons with ADHD, could be corrected when training was  
99 shortened<sup>1,2,6,30</sup> presumably decreasing the burden of long repetitive practice on  
100 mechanisms of sustained attention<sup>8</sup>. An additional line of evidence indicates that  
101 motor training scheduled to evening hours can enhance off-line memory consolidation  
102 (the expression of delayed learning gains) in young adults with ADHD and close their  
103 learning gaps vis-à-vis typically developing adults<sup>10</sup>; presumably because evening  
104 hours are the optimum performance hours for evening-type individuals, a chronotype  
105 characterizing many of the individuals with ADHD<sup>31</sup>. It was also shown that five  
106 minutes of vigorous physical activity improve affect and executive functioning of  
107 children with symptoms of ADHD<sup>32</sup>.

108  
109 The beneficial effects of both time-of-day and physical activity may reflect an effect  
110 of the general level of arousal during practice in the acquisition of skill in persons with  
111 ADHD. Theoretical accounts of ADHD, such as the state regulation model<sup>33</sup> and dual-  
112 process models<sup>34,35</sup> propose that the high within-subject fluctuations of cognitive  
113 performance in ADHD may reflect problems in regulating arousal<sup>36,37</sup>. An optimal  
114 arousal level is considered a prerequisite for successful cognitive functioning, as both  
115 too little or too much arousal can adversely affect task performance<sup>38,39</sup>. Individuals  
116 with ADHD tend to be under-aroused in “normal” performance<sup>40,41</sup> and learning  
117 conditions<sup>39,42,43</sup>.

118  
119 Arousal levels are affected by environmental noise<sup>44</sup>. Task-irrelevant sensory noise is  
120 ubiquitous and is mostly considered detrimental and distractive<sup>29,45</sup>; individuals with  
121 ADHD can be even more prone to distraction than typical peers<sup>46</sup>. Nevertheless,  
122 improvements in the performance of individuals with ADHD were reported in various  
123 primary tasks when extra-task stimulation, such as auditory noise, was added (e.g.,<sup>47-</sup>  
124 <sup>50</sup>). These paradoxical effects are not well understood, but background sensory  
125 stimulation was suggested to serve as a generator of increased arousal<sup>39</sup> or as a  
126 compensatory input needed to upregulate a hypo-functioning dopaminergic system in  
127 ADHD<sup>51,52</sup>.

128  
129 The objective of the current study was to compare the immediate and long-term  
130 effects of low-intensity, task-irrelevant ‘noise’ - vibro-tactile stimulation to the trunk  
131 combined with acoustic vibration through earphones - afforded during the practice of  
132 an instructed finger opposition sequence (FOS) in non-medicated young adults with  
133 ADHD and their typical peers (without ADHD) (Figure 1). The FOS task was used as  
134 the to-be-learned task because numerous studies have shown that the time-course of  
135 FOS learning in young adults with ADHD is atypical<sup>1,10,30,53</sup>. Behavioural measures of  
136 speed and accuracy of performance at successive time points following a single  
137 training session (immediate, 24h and one week re-tests) were assessed. We tested the  
138 conjecture that the background vibratory stimulation (VtSt) would act as a non-  
139 specific stimulant for the ADHD group and would therefore enhance motor  
140 performance both during the acquisition and the consolidation phases. In typical  
141 young adults, with no ADHD, VtSt was recently found to adversely affect the  
142 consolidation gains in FOS performance<sup>10</sup>. We also tested performance with or  
143 without VtSt afforded during re-testing at one week post-training; the conjecture was  
144 that if VtSt would become, at least in part, an integrated aspect in the skill attained in  
145 practice, VtSt affordance would significantly upregulate performance.

146

147 Participants from both pools, ADHD and Control, were randomly assigned to one of  
148 the two experimental conditions: (1) Training with vibrotactile sensory stimulation:  
149 ADHD group, N=17 (ADHDVtSt) and Control group, N=16 (ContVtSt); (2) Training  
150 without vibrotactile sensory stimulation (ADHDNoVtSt, N=16 and ContNoVtSt,  
151 N=16) (Figure 1b). During the training blocks the participants in the sensory  
152 stimulation groups (VtSt) experienced minor vibrations delivered to the trunk by  
153 means of a commercial vibrating cushion (Homedics Inc). The cushion produced  
154 vibrotactile stimulation with a main frequency of ~65Hz, resulting in ~41dB noise.  
155

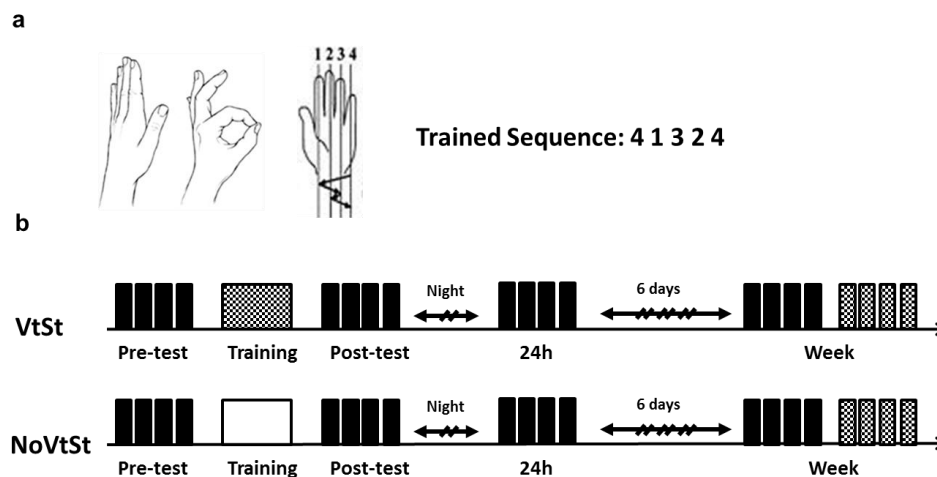

156 **Figure 1:** Study task and design. a) The finger-to-thumb opposition sequence (FOS)  
157 task. b) Participants were trained (160 cued repetitions of the sequence) without VtSt  
158 (white box) or with VtSt (checkboard box) in a single practice session in the morning  
159 hours. Performance was tested (four 30-sec. self-initiated performance blocks without  
160 VtSt) in 4 time-points: Pre-test before training, Post-test immediately after training,  
161 24h after training and a Week after training (black narrow boxes). Performance of the  
162 trained sequence was also re-tested with VtSt afforded concurrently with the test  
163 blocks (checkboard narrow boxes).  
164  
165

## 166 Results

167

### 168 Absolute data

169

170 There were no significant differences in performance speed (the number of correct  
171 sequences performed, on average, in the test) between the four groups (one-way  
172 ANOVA,  $F(3,64)=0.478$ ,  $p=0.699$ ) at pre-training (pre-test). Also, there was no  
173 significant difference between the pre-training performance of the participants with  
174 and without ADHD ( $t(63)=-0.668$ ;  $p=0.507$ ).  
175

176

176 Overall, there was a significant improvement in speed across the study period (4 time-  
177 points), in all four groups ( $F(3,183)=330.351$ ,  $p<0.001$ ,  $MSE=2930.21$ ,  $\eta^2=0.844$ )  
178 (**Figure 2a**). There was no significant group effect ( $p=0.465$ ), but there was a trend  
179 towards a significant interaction of time-point X group ( $F(9,183)=2.108$ ,  $p=0.069$ ,  
180  $MSE=16.579$ ,  $\eta^2=0.082$ ). Post-hoc group comparisons showed that participants with  
181 ADHD when trained without background stimulation (ADHDNoVtSt) gained  
182 relatively less, overall, compared to the ADHDVtSt and the ContNoVtSt groups,

183 although their performance did not significantly differ from that of typical young  
 184 adults experiencing the background stimulation (ContVtSt) (**Figure 2a,b**).

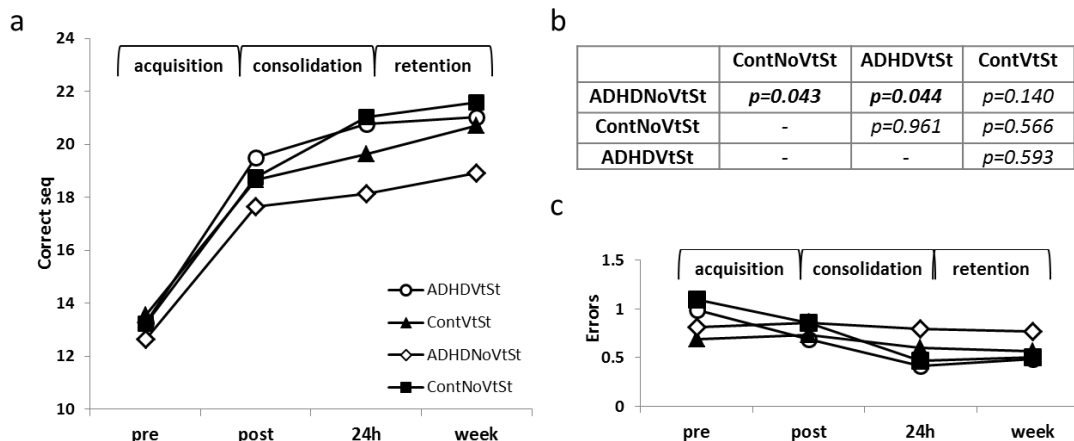

185  
 186 **Figure 2.** The time course of performance changes in the four experimental groups  
 187 (ADHDNoVtSt-ADHD training with no vibratory sensory stimulation, ADHDVtSt –  
 188 ADHD training with vibratory sensory stimulation, ContNoVtSt – typical adults  
 189 training with no vibratory sensory stimulation, ContVtSt - typical adults training with  
 190 no vibratory sensory stimulation). (a) The number of correct sequences tapped in a  
 191 test block (speed) in the 4 time-points. All groups benefitted from training and  
 192 improved across the study period. The acquisition and “offline”, consolidation phase  
 193 gains in speed were well maintained across the 1 week retention interval. (b) Post-hoc  
 194 (LSD) pair-wise group comparisons of performance speed across the four time points.  
 195 Participants with ADHD given training without background stimulation  
 196 (ADHDNoVtSt) differed from the ADHDVtSt and the ContNoVtSt groups in the  
 197 time-course of improvement. (c) The absolute number of sequencing errors  
 198 committed in the 4 tests (time-points). Performance was very accurate throughout.  
 199 Each data point depicts the mean of group performance at the time-point; bars - SEM.  
 200

201 Tests to assess the contributions of the 3 time intervals (acquisition; overnight  
 202 consolidation and 1-week retention) to the improvements in speed, showed that the  
 203 training session resulted in early (within-session) gains and in additional delayed  
 204 (post-training, time-dependent) gains in performance, across all groups (**Figure 2a**).  
 205 The within-session gains were robust and similar across groups (*acquisition interval*:  
 206  $F(1,61)=443.106$ ,  $p<0.001$ ,  $MSE=3579.40$ ,  $\eta^2=0.879$ ) and there was no significant  
 207 group x time-point interaction ( $F(1,61)=1.252$ ,  $p=0.299$ ,  $MSE=10.117$ ,  $\eta^2=0.058$ ).  
 208 The delayed, off-line, gains in performance were robust as well (*consolidation*  
 209 *interval*:  $F(1,61)=36.317$ ,  $p<0.001$ ,  $MSE=252.972$ ,  $\eta^2=0.373$ ). However, there was a  
 210 significant group x time-point interaction during this phase ( $F(3,61)=3.221$ ,  $p=0.029$ ,  
 211  $MSE=22.439$ ,  $\eta^2=0.137$ ), reflecting a relative lag that developed by 24h post-training  
 212 in the ADHDNoVtSt group compared to the control participants trained with or  
 213 without the background stimulation; this lag was apparent also relative to the  
 214 participants with ADHD who were afforded VtSt during training (**Figure 2**). The  
 215 gains in speed attained at the 24h post-training test were well maintained over the 1-  
 216 week retention interval with small but significant further improvements (*retention*  
 217 *interval*:  $F(1,61)=10.374$ ,  $p=0.002$ ,  $MSE=47.624$ ,  $\eta^2=0.145$ ). No significant group  
 218 effects ( $p=0.159$ ) or a group X time-point interaction ( $F(1,61)=1.102$ ,  $p=0.355$ ,  
 219  $MSE=5.059$ ,  $\eta^2=0.051$ ) were observed.

220

221 On average the participants in all four groups tended to commit very few, if any,  
222 errors (**Figure 2c**). Nevertheless, absolute accuracy improved significantly across the  
223 study period ( $F(3,183)=6.256$ ,  $p<0.001$ ,  $MSE=6.527$ ,  $\eta^2=0.093$ ) i.e., the absolute  
224 number of errors decreased in all 4 groups. Thus, there was no trade-off between the  
225 improvements in speed and the number of errors committed. There was no significant  
226 group effect ( $p=0.141$ ) and no significant interaction of time-point X group ( $p=0.251$ ).

227

228 The effects of VtSt, afforded during training, were further explored in participants  
229 with ADHD. There were no significant differences in the initial performance (pre-  
230 test) of the two ADHD groups ( $t(31)=-0.633$ ,  $p=0.532$  and  $t(30)=-0.658$ ,  $p=0.515$ ;  
231 speed and accuracy, respectively), and moreover both groups (ADHDNoVtSt,  
232 ADHDVtSt) showed, across the 4 time-points, significant gains in speed (correct  
233 sequences) and a decrease in errors ( $F(3,93)=141.318$ ,  $p<0.001$ ,  $MSE=1379.324$ ,  
234  $\eta^2=0.820$ ;  $F(3,93)=2.651$ ,  $p=0.053$ ,  $MSE=2.516$ ,  $\eta^2=0.079$ , respectively) (**Figure 3a**).  
235 There was a trend towards a significant main effect of group for correct sequences  
236 ( $F(1,31)=3.347$ ,  $p=0.077$ ,  $MSE=411.658$ ,  $\eta^2=0.097$ ) but not for errors ( $p=0.303$ ).  
237 There was also a trend towards a significant time-point X group interaction in speed  
238 ( $F(3,93)=2.428$ ,  $p=0.070$ ;  $MSE=23.695$ ,  $\eta^2=0.073$ ) but not for errors ( $p=0.114$ ).

239

240 The two ADHD groups expressed similar gains across the training session. Both  
241 groups improved in speed, with no costs in accuracy (speed:  $F(1,31)=243.870$ ,  
242  $p<0.001$ ,  $MSE=2021.758$ ,  $\eta^2=0.887$ ; accuracy:  $p=0.259$ ) and there were no significant  
243 group effects ( $p=0.195$ ;  $p=0.992$ , speed and accuracy, respectively). There was a trend  
244 towards a significant group X time-points interaction for correct sequences,  
245 ( $F(1,31)=3.323$ ,  $p=0.078$ ,  $MSE=26.329$ ,  $\eta^2=0.097$ ) (but not for errors,  $p=0.127$ )  
246 reflecting the larger gains in performance rates in the ADHDVtSt compared to the  
247 ADHDNoVtSt group (**Figure 3a**). One-way ANOVA confirmed that at immediate  
248 post-training test there was a marginally significant advantage in performance rate for  
249 the participants with of the VtStADHD group (speed:  $F(1,31)=3.391$ ,  $p=0.075$ ,  
250  $MSE=27.381$ ; accuracy:  $p=0.650$ ).

251

252 Participants with ADHD continued to improve across the 24h between-sessions  
253 interval (comparing post-test, 24h). There were robust additional improvements in  
254 terms of speed with no loss of accuracy ( $F(1,31)=10.047$ ,  $p=0.003$ ,  $MSE=70.375$ ,  $\eta^2=$   
255  $0.245$ ;  $p=0.129$ , respectively). Although no significant group X time-point  
256 interactions were found ( $p=0.220$ ,  $p=0.330$ , speed and accuracy, respectively), there  
257 was a significant group effect ( $F(1,31)=4.740$ ,  $p=0.037$ ,  $MSE=328.115$ ,  $\eta^2=0.133$ ).  
258 Indeed, one-way ANOVA confirmed that at 24h post-training there was a significant  
259 advantage in performance rate for the participants with ADHD given the VtSt during  
260 training (speed:  $F(1,31)=5.226$ ,  $p=0.029$ ,  $MSE=57.394$ ; accuracy:  $p=0.123$ ).

261

262 There was a trend for additional gains across the retention interval (comparing 24h  
263 test, 1-week test) in speed ( $F(1,31)=2.922$ ,  $p=0.097$ ,  $MSE=17.531$ ,  $\eta^2=0.086$ ) with no  
264 loss of accuracy ( $p=0.851$ ). There was no significant group X time-point interaction  
265 for speed or accuracy ( $p=0.237$ ,  $p=0.642$ , respectively), but the advantage of the  
266 ADHDVtSt group persisted. It was reflected in significant group effects both for the  
267 number of correct sequences executed ( $F(1,31)=4.572$ ,  $p=0.040$ ,  $MSE=371.364$ ,  
268  $\eta^2=0.129$ ) and the number of errors ( $F(1,31)=5.370$ ,  $p=0.027$ ,  $MSE=7.300$ ,  
269  $\eta^2=0.148$ ), with the ADHDVtSt group outperforming the ADHDNoVtSt group  
270 (**Figure 3a**).

271

272 The effects of adding the background sensory stimulation (VtSt), on the performance  
 273 of the trained movement sequence, were assessed during the 1-week retention test  
 274 (**Figure 3a**). The affordance of VtSt during the performance test significantly  
 275 improved the performance both in terms of the number of correct sequences  
 276 (increased) and of the number of errors committed (decreased) (speed:  
 277  $F(1,31)=15.995$ ,  $p<0.001$ ,  $MSE=107.088$ ,  $\eta^2=0.348$  and accuracy:  $F(1,31)=6.017$ ,  
 278  $p=0.020$ ,  $MSE=3.116$ ,  $\eta^2=0.163$ ). A trend towards a significant group effect was also  
 279 found, only for speed ( $F(1,31)=3.588$ ,  $p=0.068$ ,  $MSE=354.708$ ,  $\eta^2=0.107$ ; accuracy:  
 280  $p=0.436$ ). There was no significant group X time-point interaction for speed  
 281 ( $p=0.424$ ); accuracy tended to improve in the ADHDNoVtSt group ( $F(1,31)=3.823$ ,  
 282  $p=0.060$ ,  $MSE=1.979$ ,  $\eta^2=0.110$ ).

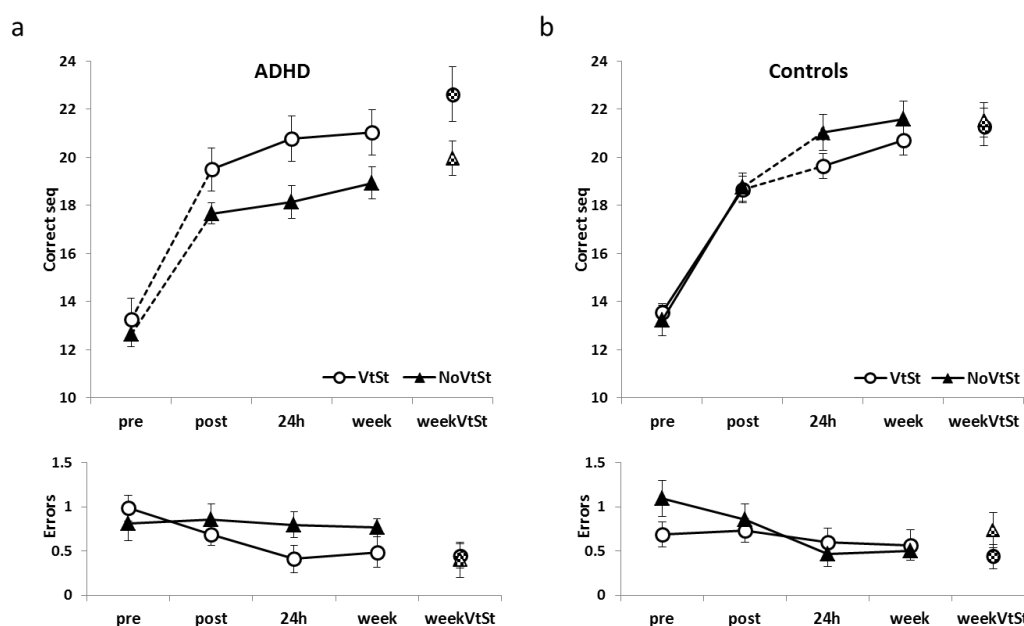

283

284 **Figure 3.** Time-course of learning with (open circles) or without (black triangles)  
 285 background sensory stimulation. (a) Participants with ADHD. Training with VtSt  
 286 resulted in larger within-session gains in the number of correct sequences and this  
 287 advantage of the ADHDVtSt group was further increased by robust between-session  
 288 gains attained at the 24h post-test. Both ADHD groups showed a robust boost in  
 289 performance when VtSt was afforded during the retention test. (b) Control  
 290 participants. There were robust within-session gains in the number of correct  
 291 sequences, irrespective of whether VtSt was afforded, but training with VtSt resulted  
 292 in smaller between-session gains. Both Control groups were unaffected by VtSt  
 293 afforded during the retention test. Upper panels – mean number of correct sequences;  
 294 Lower panels – number of errors. Dashed line – significant groups X time-point  
 295 interaction; Chess board markers – test with VtSt; bars – SE.

296

297 Similar analyses in participants without ADHD (Control groups), showed that the  
 298 affordance of VtSt during training had no effect on the immediate post training  
 299 performance, but resulted in relatively smaller gains in speed and accuracy expressed  
 300 during the overnight, 24 hours consolidation phase; in line with a previous study<sup>29</sup>.  
 301 Nevertheless, the gap between the two groups tended to close by 1 week post training  
 302 (**Figure 3b**). There were no significant differences in initial performance (pre-test)  
 303 between the two Control groups ( $t(30)=-0.451$ ,  $p=0.655$ , speed;  $t(30)=1.650$ ;  $p=0.109$ ,  
 304 accuracy) and both groups (ContNoVtSt and ContVtSt) showed significant gains



305 (F(3,90)=196.252,  $p < 0.001$ , MSE=1560.55,  $\eta^2=0.867$  and F(3,90)=3.636,  $p=0.016$ ,  
306 MSE=4.148,  $\eta^2=0.053$ , speed and accuracy, respectively) across the four time-points  
307 of the study. There was no main effect of group for correct sequences ( $p=0.505$ ) and  
308 for errors ( $p=0.637$ ), but there was a marginally significant time-point X group  
309 interaction in speed (F(3,90)=2.379,  $p=0.075$ , MSE=18.913,  $\eta^2=0.073$ ) though not  
310 for accuracy ( $p=0.176$ ). A comparison of the performance of the two Control groups  
311 for each of the study phases (acquisition, 24 hours consolidation, 1-week retention)  
312 showed robust learning and no differences between groups during acquisition  
313 (*Supplementary Results*) (**Figure 3b**). However, the ContVtSt group had smaller  
314 consolidation phase gains compared to the ContNoVtSt group. Both control groups  
315 continued to improve across the 24h between-sessions interval in terms of speed  
316 (F(1,30)=22.893,  $p < 0.001$ , MSE=167.379,  $\eta^2=0.433$ ) and at no cost in accuracy  
317 (F(1,30)=3.839,  $p=0.059$ , MSE=4.254,  $\eta^2=0.113$ ). But although no significant group  
318 effects were found ( $p=0.360$ ,  $p=0.892$ ; speed and accuracy, respectively) there was a  
319 trend towards a group X time-point interaction for speed (F(1,30)=3.681,  $p=0.065$ ,  
320 MSE=26.910,  $\eta^2=0.109$ ), reflecting the smaller, on average, consolidation phase  
321 gains expressed when VtSt was afforded during training. There was no interaction  
322 effect for the errors ( $p=0.380$ ). In both control groups, additional gains in speed  
323 occurred during the week-long retention interval (F(1,30)=14.325,  $p=0.001$ ,  
324 MSE=42.250,  $\eta^2=0.323$ ) with no costs in accuracy ( $p=0.999$ ).

325

326 The affordance of VtSt during the performance test did not affect the performance of  
327 control subjects both in terms of the number of correct sequences ( $p=0.431$ ) and of the  
328 errors ( $p=0.755$ ). There were no group effects ( $p=0.554$  and  $p=0.510$ ; speed and  
329 accuracy, respectively) and no significant group X time-point interaction ( $p=0.378$   
330 and  $p=0.218$ , speed and accuracy, respectively).

331

332 *Normalized data*

333

334 To enable a direct comparison between the gains of the ADHD and the no-ADHD  
335 groups, data were normalized relative to the mean pre-test baseline performance of  
336 each individual, yielding the relative improvements of each individual for the  
337 acquisition, the overnight consolidation and the retention intervals (**Figure 4**). There  
338 were no significant differences in acquisition phase gains between the NoVtSt groups  
339 (ContNoVtSt, ADHDNoVtSt;  $t(30)=-0.156$ ,  $p=0.649$ ). However, the acquisition  
340 gains in the 2 groups experiencing VtSt during training tended towards a significant  
341 difference ( $t(31)=-1.796$ ,  $p=0.080$ ), with the ADHDVtSt group tending on average to  
342 outperforming the ContVtSt group (**Figure 4a**).

343

344 When training was afforded without VtSt there were, overall, significant gains in  
345 performance in terms of speed (number of correct sequences executed in the test)  
346 normalized to pre-test performance, at the 3 time-points (representing gains in  
347 performance at the end of 3 time-intervals: acquisition, consolidation, 1-week  
348 retention) in both groups (ContNoVtSt, ADHDNoVtSt) i.e., irrespective of whether  
349 participants had ADHD symptoms (F(2,60)=20.304,  $p < 0.001$ , MSE=0.185,  $\eta^2=0.404$ )  
350 (**Figure 4a, upper panel**). There was no significant group effect ( $p=0.133$ ), but there  
351 was a significant time-point X group interaction (F(2,60)=4.172,  $p=0.020$ ,  
352 MSE=0.038,  $\eta^2=0.122$ ). Post-hoc comparisons indicated that the course of  
353 performance improvements differed significantly in the 24 hours post training  
354 consolidation phase; while both groups improved in terms of speed (F(1,30)=13.239,

355  $p=0.001$ ,  $MSE=0.155$ ,  $\eta^2=0.306$ ), there was a significant interaction of group X time-  
 356 points across the consolidation phase ( $F(1,30)=5.649$ ,  $p=0.024$ ,  $MSE=0.066$ ,  
 357  $\eta^2=0.158$ ), originating from the ContNoVtSt group outperforming the ADHDNoVtSt  
 358 group. Comparing the relative gains during the consolidation and retention phase in  
 359 the 2 groups showed a significant main effect ( $F(1,30)=13.163$ ,  $p=0.001$ ,  $MSE=0.420$ ,  
 360  $\eta^2=0.305$ ) and a trend towards a significant group effect ( $F(1,30)=3.838$ ,  $p=0.059$ ,  
 361  $MSE=0.378$ ,  $\eta^2=0.113$ ), but no significant interaction ( $p=0.541$ ). Thus, after the  
 362 acquisition interval, if no VtSt was afforded, the Control and the ADHD groups had  
 363 similar learning curves, yet the gap (differential gains) accrued consolidation interval  
 364 was maintained (**Figure 4a, upper panel**).

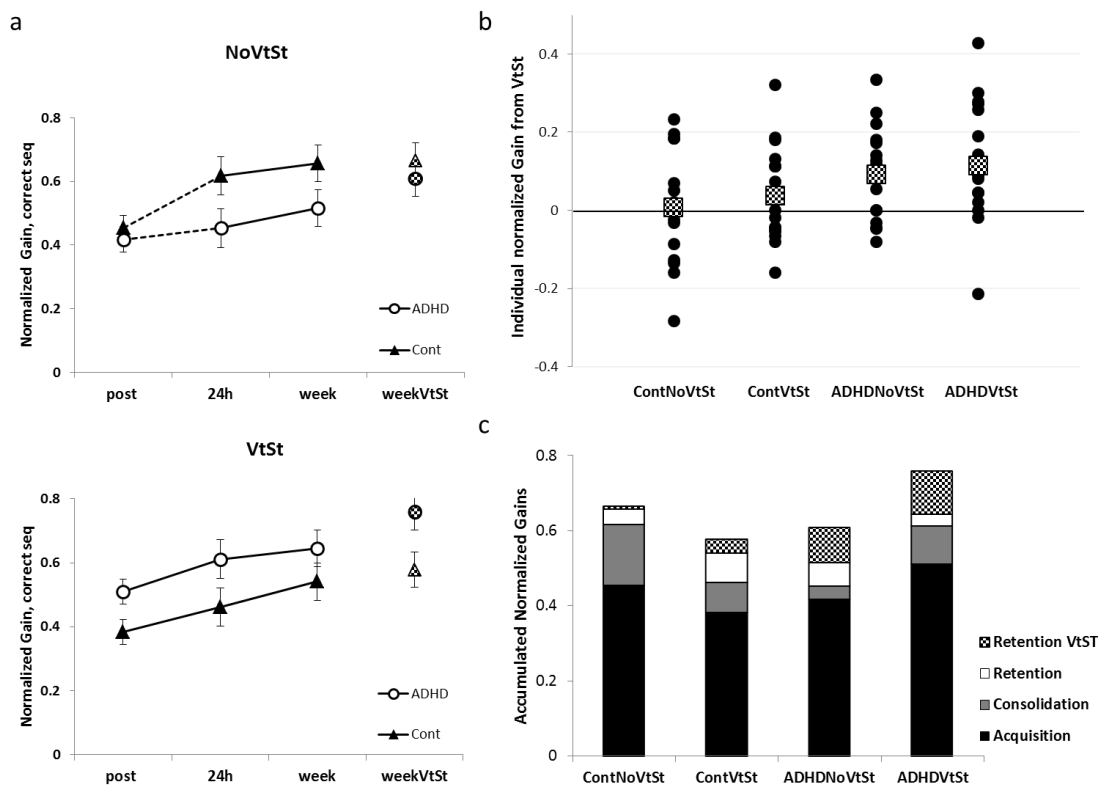

365  
 366 **Figure 4.** Normalized data. The gains at 3 time-points in participants trained with  
 367 and without VtSt. (a) Group averages of normalized gains in performance speed,  
 368 number of correct sequences ( $\Delta$ ) relative to each individual's pre-training baseline  
 369 performance. Each time-point represents the additional gains at the end of each of the  
 370 3 consecutive phases relative to baseline [post-test, acquisition=(post-pre)/pre; 24h,  
 371 consolidation=(24h-pre)/pre; 1-week, retention=(retention-pre)/pre]. Lower panel –  
 372 training with no VtSt; upper panel – training with VtSt). Dashed line – a significant  
 373 interaction of group and time-point. Bars – SE. Circles – ADHD; triangles – Cont.;  
 374 chess board markers – retention test with VtSt. (b) Individual normalized gains during  
 375 the test with VtSt performed at 1-week retention (retentionVtSt). The individual VtSt  
 376 gains scores were calculated as the difference between (the mean of the 4) test blocks  
 377 with VtSt and the (4) test blocks without VtSt at retention; i.e., (retentionVtSt-  
 378 retention)/pre-test. Squares chess-board markers – group mean relative gains. (c)  
 379 Contribution of the three learning phases, and the affordance of VtSt during the final  
 380 test, to the overall normalized gains in performance.

381  
 382 Training with VtSt, however, resulted in a different pattern of results (**Figure 4a,**  
 383 **lower panel**). Overall, significant gains in performance in terms of speed (number of

384 correct sequences) normalized to pre-test performance, at the 3 time-points  
385 (representing the 3 time-intervals: acquisition, consolidation, 1-week retention) were  
386 observed for both groups (ADHDVtSt, ContVtSt),  $F(2,60)=20.276$ ,  $p<0.001$ ,  
387  $MSE=0.179$ ,  $\eta^2=0.395$ ). There was no significant difference between the groups'  
388 overall performance ( $p=0.135$ ) and no interaction effects ( $p=0.491$ ) were observed.  
389 However, a comparison of 2 time-points (post-test and 24 hours consolidation,  
390 representing the gains during the consolidation phase) showed that while both groups  
391 (ContVtSt, ADHDVtSt) had significant gains ( $F(1,31)=16.573$ ,  $p<0.001$ ,  $MSE=0.134$ ,  
392  $\eta^2=0.348$ ), there was a marginally significant group effect  $F(1,31)=3.414$ ,  $p=0.074$ ,  
393  $MSE=0.315$ ,  $\eta^2=0.099$ ), suggesting that the ADHDVtSt group was better than the  
394 ContVtSt group immediately after training and this advantage continued across the  
395 consolidation period. The group X time-point interaction was not significant  
396 ( $p=0.260$ ). Both groups continued to improve over a 1 week interval. A comparison of  
397 2 time-points (24 hours consolidation and 1-week retention) showed that the 2 groups  
398 (ContVtSt, ADHDVtSt) had significant gains ( $F(1,31)=6.299$ ,  $p=0.018$ ,  $MSE=0.052$ ,  
399  $\eta^2=0.169$ ) during the retention phase but there was no significant group difference  
400 ( $p=0.174$ ) and no significant interaction ( $p=0.312$ ).

401  
402 To directly compare the effects of adding the sensory stimulation during a  
403 performance test, in participants with and without ADHD, an rm-ANOVA with each  
404 participant's normalized performance scores in the 2 test conditions (1-week, 1-  
405 weekVtSt) and the ADHD status (ADHD, Cont) was performed. There was a  
406 significant test condition effect ( $F(1,63)=11.877$ ,  $p=0.001$ ,  $MSE=0.117$ ,  $\eta^2=0.348$ )  
407 indicating overall better performance in the test blocks with VtSt, but also a  
408 significant interaction of test condition x ADHD status ( $F(1,63)=4.648$ ,  $p=0.035$ ,  
409  $MSE=0.046$ ,  $\eta^2=0.070$ ), indicating that participants with ADHD responded to the  
410 presence of the vibrotactile stimulation during the test in a different manner compared  
411 to non-ADHD controls. No group effect was found ( $p=0.697$ ). Most of the  
412 participants with ADHD benefitted from the addition of VtSt during the testing of  
413 performance (**Figure 4b**). Post-hoc one-sample two-tailed t-test analyses showed that  
414 in both the ADHD groups, the mean additional gains in performance in the test blocks  
415 wherein background VtSt was afforded, were significantly above zero ( $t(16)=2.744$ ,  
416  $p=0.014$ ;  $t(15)=2.695$ ,  $p=0.017$ , ADHDVtSt and ADHDNoVtSt, respectively).  
417 However, in both Control groups the mean contribution of the added VtSt to  
418 performance was not significantly different from zero ( $t(15)=1.182$ ,  $p=0.256$ ;  
419  $t(15)=0.213$ ,  $p=0.834$ , ContVtSt and ContNoVtSt, respectively). Thus, the participants  
420 with ADHD also benefitted from the affordance of VtSt during performance testing,  
421 irrespective of whether they were exposed to the VtSt during training on the  
422 movement sequence a week earlier or not; no such group benefit was found in non-  
423 ADHD controls.

424  
425 The groups' mean normalized gains in performance accrued during specific time  
426 intervals along the course of learning the new motor sequence are presented in the  
427 **Figure 4c**. Following the single training session, all groups improved by more than  
428 50% relative to the pre-training performance baseline. But by the end of the study (as  
429 expressed in the test session at 1 week post-training) whether participants were given  
430 training with or without VtSt had a differential effect on the overall gains in  
431 performance, depending on whether the trainees had ADHD symptoms or not. After  
432 training with no VtSt, participants with ADHD showed an overall improvement of  
433 performance speed (by 51.6%) but the gains were, on average, smaller than those

434 attained by their typical peers with no ADHD (overall improvement, 65.8%) who  
 435 trained in the same condition. However, VtSt during training (in an otherwise  
 436 identical protocol) benefited subsequent performance in participants with ADHD  
 437 (overall improvement, 64.5%) but was relatively detrimental for typical controls  
 438 (overall improvement, 54.1%) (**Figure 4c**).

439  
 440 A performance advantage for the participants with ADHD symptoms was also  
 441 apparent, irrespective of how they were trained, when performance was tested in the  
 442 presence of VtSt (during the retention test). VtSt during the test boosted the  
 443 performance in the majority of the participants with ADHD (mean additional gain of  
 444 11.4% and 9.2% in ADHDVtSt and ADHDNoVtSt, respectively), while in typical  
 445 controls the mean effect was not significant (mean additional gain of 3.7% and 0.7%  
 446 in ContVtSt and ContNoVtSt, respectively). Note, however, that in both groups, there  
 447 were individuals that responded to the presence of the VtSt, either by boosting or by  
 448 degrading their speed of motor sequence performance (**Figure 4b**).

449

#### 450 *Chronotype and Sleep data.*

451 There was a trend towards a significant difference in the mean MEQ scores between  
 452 the ADHD and the control participants (**Table 1**), with persons with ADHD more  
 453 inclined to be evening-oriented. This tendency was observed in spite of the fact that  
 454 extreme morning and evening chronotypes were excluded from the experiment.  
 455 Means of time-in-bed, sleep latency (time to fall asleep), total sleep time (minutes),  
 456 and sleep efficiency ((total sleep time/time in bed)\*100) parameters were derived  
 457 from the actigraphy during the post-training night. These parameters were compared  
 458 across participants with and without ADHD using two-tailed independent sample t-  
 459 tests. No significant differences were found between the ADHD and control  
 460 participants with the exception of sleep latency; participants with ADHD had a  
 461 marginally significant tendency to have longer sleep latencies (**Table 1**).

462

463 Table 1. MEQ scores and Actigraphy data.

|                                  | ADHD / Cont<br>(mean±SD) | t (62) | Sig. (2-tailed) |
|----------------------------------|--------------------------|--------|-----------------|
| <b>MEQ score</b>                 | 48.4±7.6 / 51.8±6.9      | -1.846 | <b>0.070</b>    |
| <b>Sleep Latency, min</b>        | 18.9±25.6 / 9.6±14.4     | 1.697  | <b>0.095</b>    |
| <b>Sleep Efficiency, %</b>       | 75.6 / 77.2              | -0.466 | 0.643           |
| <b>Time in bed, min</b>          | 480.1±91.2 / 456.6±75.0  | 7.075  | 0.285           |
| <b>Total Sleep Time, min</b>     | 358.2±72.7 / 361.7±66.2  | -0.191 | 0.849           |
| <b>Mean Number of Awakenings</b> | 5.3±3.6 / 4.8±2.5        | 0.959  | 0.341           |

464

465 Pearson correlation analyses showed that in the NoVtSt groups, irrespective of the  
 466 ADHD status, higher MEQ scores (higher morningness) correlated with higher  
 467 consolidation gains ( $r=0.34$ ,  $n=33$ ,  $p=0.032$ ). In the groups afforded the VtSt no such  
 468 correlation was found ( $r=-0.25$ ,  $n=33$ ,  $p=0.161$ ).

469

## 470 **Discussion**

471

472 In typical young adults minor task-irrelevant vibro-tactile stimulation afforded during  
 473 training on a novel sequence of movements can selectively impair off-line

474 consolidation processes and, as a result, decrease the long-term practice related gains  
475 in performance<sup>29</sup>. Here we replicated this result, but, we also show that in the same  
476 background sensory stimulation condition there was, paradoxically, a positive effect  
477 on learning and the generation of long-term practice related gains, in young adults  
478 with ADHD. Moreover, the current results demonstrate an experiential condition  
479 wherein persons with ADHD have a clear advantage in skill acquisition and in  
480 subsequent performance over their typical peers.

481  
482 In line with previous studies<sup>1,10,30</sup>, participants with ADHD, who had practice without  
483 sensory stimulation (NoVtSt), i.e., when training in standard, quiet, laboratory  
484 conditions, showed, in comparison to their typical peers (without ADHD), less-than-  
485 expected overnight consolidation-phase gains in the performance of the trained  
486 movement sequence. Participants with ADHD tended to underperform when tested  
487 overnight and began to lag behind typical peers at later time-points, despite the fact  
488 that both groups expressed equal within-session gains. However, the current results  
489 show that an identical practice protocol, but with VtSt afforded in the background  
490 throughout training, resulted in larger improvements in task performance within-  
491 session, as well as in robust overnight consolidation phase gains in persons with  
492 ADHD. These gains were well retained and expressed in a re-test after a week-long  
493 interval in which no additional training was afforded. Typical young adults, training  
494 with VtSt, showed clear costs in terms of their ability to express overnight delayed  
495 gains in performance as well as by the end of the study period. Moreover, by the end  
496 of the study period, when performance was tested with VtSt afforded during the tests,  
497 participants with ADHD were clearly helped; many of their typical peers were  
498 hampered. Thus, training with background vibratory noise resulted in distinct and  
499 opposing effects in young adults with and without ADHD; while the learning related  
500 gains in performance tended to diminish in typical adults, participants with ADHD  
501 became better learners, expressed larger consolidation phase gains and subsequently  
502 outperformed their typical peers. The affordance of VtSt during the subsequent testing  
503 of performance benefitted participants with ADHD but not their typical peers.

504  
505 The addition of vibrotactile–auditory sensory stimulation (VtSt) had no effect on the  
506 immediate post-training performance of the task by participants without ADHD. The  
507 absence of adverse effects on performance and on the magnitude of ‘online’ learning  
508 in typical participants suggests that the background stimulation was indeed  
509 experienced as minimal and did not significantly avert attention from the task during  
510 the training session. Participants in the ADHD group also showed no sign of being  
511 distracted by the background stimulation; in fact the VtSt stimulation afforded during  
512 practice turned the practice session into a more efficient learning experience for them.

513  
514 Eveningness and sleep problems are common in adults with ADHD<sup>31</sup>. However, the  
515 actigraphy data showed that in the current study the participants of the ADHD and the  
516 Cont groups had, overall, similar sleep profiles in the post-training night, except for  
517 the tendency of the ADHD participants to have longer sleep latency periods. The  
518 similarity between groups in terms of sleep parameters was partly the result of the  
519 screening procedure adopted, because extreme morning and evening chronotypes  
520 were excluded from the experiment. As no differences were found between the typical  
521 controls and the participants with ADHD, our results cannot be taken to reflect a bias  
522 in sleep parameters. Note that all participants had relatively low sleep efficiency  
523 (percentage of time in sleep relative to total time in bed). This is an increasingly

524 common finding in young adults and adolescents, attributed to the use of light-  
525 emitting devices at evening hours<sup>54</sup>. We also tested for a possible relationship  
526 between the participants' chronotype and their learning abilities, given that training  
527 and testing took place in the morning hours<sup>31</sup>. Evening oriented participants are more  
528 likely to show lower arousal levels and lower cognitive performance<sup>55</sup> during the  
529 morning hours compared to morning-oriented peers, and we conjectured that this may  
530 lead to a less engaging learning experience and subsequently to the expression of  
531 smaller delayed gains in performance. Indeed, the results showed that in the NoVtSt  
532 groups, higher morningness correlated with larger consolidation phase gains  
533 irrespective of whether participants had ADHD. Because of the differential effects of  
534 VtSt in the 2 groups and the small number of individuals in each of the 2 VtSt groups,  
535 correlation analyses with chronotype in these samples were not informative.

536  
537 The impact of 'state'<sup>33</sup> (ongoing or background activity<sup>56</sup>), and, specifically, levels of  
538 arousal, prior to or during test or learning sessions is, in practice, an often neglected  
539 factor in memory research. Even in standard laboratory training protocols an optimal  
540 arousal state cannot be, but often is, assumed<sup>10,33,57</sup>. Moreover, individuals may differ  
541 in the level of arousal optimal for enabling them to attain optimal performance<sup>33</sup> and,  
542 as the Yerkes–Dodson model suggests, both too little or too much arousal can  
543 adversely affect task performance<sup>38</sup>. Vibratory stimulation is considered an alerting  
544 intervention, improving vigilance<sup>58</sup> and increasing skeletal muscle tone. In addition,  
545 vibratory or auditory<sup>59</sup> stimulation can induce affective reactions<sup>60</sup>. Both the  
546 enhancement or impairment of memory<sup>25</sup> have been shown to be modulated by  
547 stress<sup>61,62</sup> depending on task and training conditions. Specific combination of  
548 hippocampal activation during motor sequence practice session and of post-training  
549 night sleep may be a pre-requisite for promoting the expression of delayed gains in  
550 motor sequence task performance during the consolidation phase<sup>63</sup>. Thus, both  
551 background conditions and the individuals 'state' during and after the performance of  
552 a given task may affect (as "gating" factors) the acquisition and, importantly, the  
553 consolidation of skills ('how to' knowledge)<sup>10,29</sup>.

554  
555 In ADHD arousal regulation may be atypical and thus may constitute one of the  
556 'core' characteristics of the condition<sup>64</sup>. Individuals with ADHD tend to be under-  
557 aroused<sup>39,42,43</sup>, and often experience difficulty in sustaining attention during repetitive  
558 tasks<sup>51</sup>. The restless behaviour of individuals with ADHD has been interpreted as self-  
559 stimulation in order to raise their arousal level<sup>50</sup> and, consequently, performance.

560  
561 In healthy adults vibratory stimulation was reported to neutrally or negatively affect  
562 attention and cognition<sup>65,66</sup>. In clinical populations, as in ADHD, background  
563 stimulation, vibration or white auditory noise<sup>50</sup> have been proposed as means to  
564 enhance attention, and benefit learning processes<sup>67</sup>, and were even suggested as an  
565 adjunct in enhancing motor training<sup>68</sup> and rehabilitation<sup>69</sup>. The current results are in  
566 line with and extend these notions. We propose that the observed benefits of VtSt to  
567 participants with ADHD may relate to upregulated arousal due to the concurrent  
568 sensory stimulation. Note, however, that in the presence of VtSt there were  
569 individuals that benefited from stimulation, also among control participants; other  
570 individuals were severely interfered by it. Thus, the individual's arousal state, as well  
571 as sensory responsivity to vibratory stimulation, may be predisposing factors in  
572 determining whether one would benefit or lose from the presence of background-  
573 environmental noise.

574

575 There is evidence that non-pharmacological interventions may up-regulate skill  
576 learning in ADHD, with recent studies focusing specifically on motor learning. First,  
577 some of the relative learning deficits in persons with ADHD could be corrected when  
578 training was shortened<sup>1,2,6,30</sup> presumably by decreasing the burden of long repetitive  
579 practice on mechanisms of sustained attention<sup>8</sup>. Second, motor training scheduled to  
580 evening hours was found to enhance off-line memory consolidation in young adults  
581 with ADHD and the learning gap vis-à-vis typically developing adults was closed<sup>10</sup>.  
582 Evening hours are more suitable in terms of arousal levels for evening-type  
583 individuals, such as many of the individuals with ADHD<sup>31</sup>. Related to this notion is  
584 the finding that five minutes of vigorous physical activity can improve affect and  
585 executive functioning of children with symptoms of ADHD<sup>32</sup>.

586

587 To conclude, our results suggest that: i) procedural memory acquisition and  
588 consolidation processes are extant in young adults with ADHD and this potential can  
589 be best unveiled in specific bio-behavioural conditions; ii) such bio-behavioural  
590 conditions should be afforded during training to enhance learning in ADHD; iii) minor  
591 background vibro-tactile stimulation may constitute an effective aid during procedural  
592 learning in ADHD; in typical peers it may slow or dampen consolidation processes.  
593 The current results also underscore the possibility that even temporary failures of  
594 arousal in ADHD can result in long-lasting and accumulating deleterious effects. We  
595 conjecture that many behavioural difficulties expressed in individuals with ADHD are  
596 related to under-arousal and that these deficits can be compensated by manipulating  
597 physical conditions so as to increase levels of arousal. From a different perspective,  
598 our results suggest that ADHD can be considered a neuro-behavioural phenotype that  
599 may confer advantages in performance, learning and skill memory consolidation in  
600 'noisy' conditions that adversely affect typical non-ADHD peers.

601

## 602 **Methods**

603

604 The study was approved by the Human Experimentation Ethics committee of the  
605 University of Haifa. All participants signed an informed consent form in accordance  
606 with the Declaration of Helsinki prior to the start of the experiment. Participants were  
607 paid (150 NIS, approximately \$40) for their participation.

608

609 Sixty five right-handed young participants (aged 19-35,  $24.6 \pm 3.8$  mean  $\pm$  s.d., 24%  
610 males) enrolled in the study. The sample size was based on the effects observed in  
611 previous studies with typical<sup>15,29</sup> and ADHD<sup>10,30</sup> participants, where the groups that  
612 did not experience interfering interventions showed 20-30% gains in performance  
613 speed during the consolidation phase, whereas the groups in suboptimal training  
614 conditions showed less than 7% delayed gains. As we expected the ADHDNoVtSt  
615 and the ContVtSt groups to have deficient off-line learning, and the ADHDVtSt and  
616 the ContNoVtSt groups to have normal off-line learning, we expected to observe  
617 similar differences in delayed gains in performance. Based on a STD of 15% in each  
618 group, and a power of 0.80, we required 16 subjects per group<sup>70</sup>.

619

620 Participants were recruited through the University of Haifa and the Technion's mass  
621 media platforms (University newspaper, Facebook pages) and an electronic message  
622 sent through the university's Centre for Students with Disabilities, for a "study on  
623 motor learning and memory". Thirty three participants met the inclusion criteria for

624 ADHD group, and thirty two typically developing adults matched by age and  
625 education, served as a control group (Controls). Inclusion criteria for the ADHD  
626 groups were as follows: (1) a formal psycho-didactic diagnosis of an attention deficit  
627 disorder (either ADD or ADHD) from an authorized clinician, psychiatrist or  
628 neurologist, approved by the University Centre for Students with Disabilities within 5  
629 years of the current study; (2) a positive screening on the adult ADHD self-report  
630 scale (ASRS)<sup>71</sup> and (3) no stimulant treatment for ADHD (methylphenidate or other  
631 stimulant drugs) during the recent period (>month). The participants of the ADHD  
632 group responded positively on 11 out of 18 items of the ASRS on average (10.9±2.8,  
633 mean±s.d.). The control participants met ≤ 3 out of 6 criteria of the ASRS screening  
634 questionnaire (first 6 items). All control participants affirmed that they were not  
635 suspected (by family members or teachers) to have, and were never diagnosed as  
636 having, ADHD/ADD during their childhood or adulthood.

637  
638 Pre-screening was done by a short telephone interview (including questions of general  
639 health status and basic demographic data) to exclude persons with diagnosed sleep,  
640 neurological or psychiatric disorders (other than ADHD), motor-skeletal diseases, use  
641 of drugs, heavy alcohol consumption and regular smoking; also excluded were  
642 persons reporting “blind” typing or skilled musical instrument playing and those  
643 reporting less than 6 hours of sleep per night or defining their sleep quality as low and  
644 insufficient. Prior to the commencement of the experiments, the invited participants  
645 completed the PSQI sleep questionnaire; only participants with global scores below  
646 the cut-off (≤5) were included<sup>72</sup>. All participants underwent chronotype assessment  
647 using the Horne-Östberg Morningness-Eveningness Questionnaire (MEQ)<sup>73</sup> extreme  
648 chronotypes (scores >70 – extreme morningness and <30 – extreme eveningness) that  
649 could bias motor performance, were excluded.

650  
651 The participants were trained and were tested on an explicitly instructed five-element  
652 finger-to-thumb opposition sequence (FOS), as in<sup>29</sup>. All sessions took place during  
653 morning hours, between 8:00 and 12:00 (Figure 1a). The participants were seated  
654 with their task performing arm positioned on a table, comfortably extended, with the  
655 palm facing up to allow video recording of all finger movements. Visual feedback  
656 was not allowed; the participants were instructed to avert their gaze away from the  
657 performing hand. Headphones (Beats Pro) were used throughout the experiment.

658  
659 The experiment included three sessions; the general design of the study is  
660 schematized in Figure 1b. In the first session, the experimenter explained and  
661 demonstrated the thumb-to-finger opposition movements the sequence assigned to  
662 each individual for training (Sequence A, Figure 1a). The participant had to correctly  
663 perform the instructed sequence on three consecutive self-paced iterations (warm-up  
664 and as a check to ensure knowledge of the required movement sequence), otherwise  
665 the instructions and demonstration were repeated, and then underwent the pre-training  
666 performance test (pre-test). The pre-test was followed by a cued, structured, training  
667 session, and an immediate post-training test (post-test). Each performance test  
668 consisted of four 30 sec long blocks. Before each block the participant was reminded  
669 to perform the sequence repeatedly and continuously “as fast and as accurately as  
670 possible” during the interval denoted by a start and a stop auditory cue signals,  
671 delivered through headset. Participants were instructed that if they became aware of  
672 committing an error they should immediately continue to the required sequence. Each  
673 test block was followed by a 30 sec rest interval. The training session consisted of 160



674 cued repetitions of the sequence, afforded in ten 30 sec. blocks. Thirty sec. long rest  
675 intervals were afforded between blocks. In each of the training blocks, the initiation of  
676 each sequence repetition was cued by a brief sound delivered at a rate 2.5 sec. per  
677 sequence.

678

679 After completing the training blocks, participants were asked to perform four  
680 additional test blocks (post-test), with instructions identical to those provided before  
681 the pre-test. Participants were re-tested, each re-test consisting of four continuous  
682 performance blocks at 24h, following a night sleep (24h re-test) and at one week  
683 (week re-test) following the training session. In addition, at the week re-test, all  
684 participants were tested in four continuous performance test blocks with the vibratory  
685 stimulation afforded concurrently, to test the on-line effect of sensory stimulation.

686

687 In pilot experiments, a higher level of stimulus intensity (~65dB) was judged as  
688 distracting by some of participants with no ADHD. Four participants with no ADHD  
689 (not included in the main study) were interviewed as to the discomfort induced by  
690 vibration stimulation at ~41dB. The level of vibratory stimulation was judged as  
691 minimally uncomfortable and non-distracting in two conditions, stimulation provided  
692 with and without the performance of the motor task. In addition, the recorded sound  
693 resulting from the cushion's vibrations was played back through the headphones at  
694 40dB. The participants in the NoVtSt condition were seated on the same cushion with  
695 the current switched off. All auditory signals, the auditory cues for the initiation and  
696 termination of each test and training block and the continuous auditory background  
697 vibration sounded during the training blocks in the VtSt groups, were recorded and  
698 provided using Audacity program (Ver 2.2, GNU General Public License).

699

700 Participants were instructed to concentrate on the motor training task to maintain  
701 maximum accuracy in sequence execution irrespective of the presence of background  
702 stimulation. At the end of each session participants were instructed not to repeat or  
703 practice the movement sequence they were trained on between the meetings.

704

705 Participants wore an actiwatch (Actigraph Co.) for 24 hours, starting from the end of  
706 the post-test to monitor sleep time, quality and length during the post-training night.  
707 The data were analysed using the ActiLife 6 software.

708

709 Performance data were analysed from video recordings. Measures of *speed* (number  
710 of correct sequences) and *accuracy* (number of errors) of performance at each 30-sec  
711 test block were derived. Means of the performance in the 4 test-blocks at each of the 4  
712 time-points (pre-test; post-test, 24h test, week retention test) as well as in the test at  
713 1-week post-training with VtSt afforded, were calculated. In addition, normalized data  
714 (relative improvement) for speed after the acquisition, the consolidation and the  
715 retention intervals were calculated relative to the mean pre-test, baseline, performance  
716 of each individual. Absolute and normalized speed and accuracy performance scores  
717 were analysed separately. Independent samples, 2-tailed t-tests were used to compare  
718 between the pre-test performance levels of the groups. Repeated measures analysis of  
719 variance (rm-ANOVA) with the 4 time-points as a within-subject factor and group  
720 (ADHDNoVtSt, ADHDVtSt, ContNoVtSt, ContVtSt) as a between-subjects factor  
721 were conducted to assess the changes in performance across the study period. Post-  
722 hoc rm-ANOVAs comparing pairs of consecutive time points were conducted to test  
723 performance changes across specific phases: acquisition (pre-test vs. post-test),

724 consolidation (post-test vs. 24h test) and retention (24h test vs. week). The affordance  
725 of VtSt during the performance test was assessed using rm-ANOVAs with 2 test  
726 conditions (with and without background VtSt) as a within-subject factor and group  
727 (ContNoVtSt, ContVtSt) as a between subjects factor.

728

### 729 **Conflict of Interest**

730 The authors declare that the research was conducted in the absence of any commercial  
731 or financial relationships that could be construed as a potential conflict of interest.

### 732 **Author contributions**

733 MK, LM and AK conceived and designed the experiments. LM and NA collected the  
734 data. LM analyzed the raw data. MK and LM did the statistical analyses and MK, LM  
735 and AK were responsible for the interpretation of the data. MK, LM and AK wrote  
736 the article.

737

### 738 **Funding**

739 The E.J. Safra Brain Research Center for the Study of Learning Disabilities is  
740 gratefully acknowledged for partially funding this project.

741

742 **References**

743

- 744 1 Adi-Japha, E., Fox, O. & Karni, A. Atypical acquisition and atypical  
745 expression of memory consolidation gains in a motor skill in young  
746 female adults with ADHD. *Res Dev Disabil* **32**, 1011-1020 (2011).
- 747 2 Mostofsky, S. H. *et al.* Atypical motor and sensory cortex activation in  
748 attention-deficit/hyperactivity disorder: a functional magnetic resonance  
749 imaging study of simple sequential finger tapping. *Biological psychiatry*  
750 **59**, 48-56 (2006).
- 751 3 Pedersen, A. & Ohmann, P. Impaired Behavioral Inhibition in Implicit  
752 Sequence Learning in Adult ADHD. *J Atten Disord* **27**, 27 (2012).
- 753 4 Pedersen, A. & Ohmann, P. Impaired Behavioral Inhibition in Implicit  
754 Sequence Learning in Adult ADHD. *Journal of attention disorders*,  
755 doi:1087054712464392 [pii] (2012).
- 756 5 Karatekin, C., White, T. & Bingham, C. Incidental and intentional sequence  
757 learning in youth-onset psychosis and Attention-Deficit/Hyperactivity  
758 Disorder (ADHD). *Neuropsychology* **23**, 445-459 (2009).
- 759 6 Barnes, K. A., Howard, J. H., Howard, D. V., Kenealy, L. & Vaidya, C. J. Two  
760 Forms of Implicit Learning in Childhood ADHD. *Developmental*  
761 *Neuropsychology* **35**, 494-505, doi:10.1080/87565641.2010.494750  
762 (2010).
- 763 7 Fox, O., Karni, A. & Adi-Japha, E. The consolidation of a motor skill in  
764 young adults with ADHD: Shorter practice can be better. *Res Dev Disabil*  
765 **52**, 135-144 (2016).
- 766 8 Sergeant, J. A. Modeling Attention-Deficit/Hyperactivity Disorder: A  
767 Critical Appraisal of the Cognitive-Energetic Model. *Biological psychiatry*  
768 **57**, 1248-1255, doi:10.1016/j.biopsych.2004.09.010 (2005).
- 769 9 Burden, M. J. & Mitchell, D. B. Implicit memory development in school-  
770 aged children with attention deficit hyperactivity disorder (ADHD):  
771 conceptual priming deficit? *Dev Neuropsychol* **28**, 779-807 (2005).
- 772 10 Korman, Levy, I. & Karni, A. Procedural Memory Consolidation in  
773 Attention-Deficit/Hyperactivity Disorder Is Promoted by Scheduling of  
774 Practice to Evening Hours. *Frontiers in Psychiatry* **8**,  
775 doi:10.3389/fpsy.2017.00140 (2017).
- 776 11 Dudai, Y., Karni, A. & Born, J. The Consolidation and Transformation of  
777 Memory. *Neuron* **88**, 20-32,  
778 doi:<http://dx.doi.org/10.1016/j.neuron.2015.09.004> (2015).
- 779 12 Verhoeven, F. M. & Newell, K. M. Unifying practice schedules in the  
780 timescales of motor learning and performance. *Hum Mov Sci* **59**, 153-169  
781 (2018).
- 782 13 Karni, A. The acquisition of perceptual and motor skills: a memory system  
783 in the adult human cortex. *Brain Res Cogn Brain Res* **5**, 39-48 (1996).
- 784 14 Korman *et al.* Daytime sleep condenses the time course of motor memory  
785 consolidation. *Nat Neurosci* **10**, 1206-1213, doi:nn1959 [pii]  
786 10.1038/nn1959 (2007).
- 787 15 Korman, Raz, N., Flash, T. & Karni, A. Multiple shifts in the representation  
788 of a motor sequence during the acquisition of skilled performance. *Proc*  
789 *Natl Acad Sci U S A* **100**, 12492-12497, doi:10.1073/pnas.2035019100  
790 2035019100 [pii] (2003).

- 791 16 Karni, A. & Sagi, D. The time course of learning a visual skill. *Nature* **365**,  
792 250-252 (1993).
- 793 17 Karni *et al.* The acquisition of skilled motor performance: fast and slow  
794 experience-driven changes in primary motor cortex. *Proc Natl Acad Sci U*  
795 *S A* **95**, 861-868 (1998).
- 796 18 Fischer, S., Hallschmid, M., Elsner, A. L. & Born, J. Sleep forms memory for  
797 finger skills. *Proc Natl Acad Sci U S A* **99**, 11987-11991 (2002).
- 798 19 Korman, M., Flash, T. & Karni, A. Resistance to interference and the  
799 emergence of delayed gains in newly acquired procedural memories:  
800 Synaptic and system consolidation? *Behavioral and Brain Sciences* **28**, 74-  
801 75 (2005).
- 802 20 Hauptmann, B., Reinhart, E., Brandt, S. A. & Karni, A. The predictive value  
803 of the leveling off of within session performance for procedural memory  
804 consolidation. *Brain Res Cogn Brain Res* **24**, 181-189 (2005).
- 805 21 Walker, M. P. A refined model of sleep and the time course of memory  
806 formation. *Behav Brain Sci* **28**, 51-64 (2005).
- 807 22 Rasch, B. & Born, J. About Sleep's Role in Memory. *Physiological Reviews*  
808 **93**, 681-766, doi:10.1152/physrev.00032.2012 (2013).
- 809 23 Robertson, E. M. From creation to consolidation: a novel framework for  
810 memory processing. *PLoS Biol* **7**, 1000019 (2009).
- 811 24 Held, R. Plasticity in sensory-motor systems. *Sci Am* **213**, 84-94 (1965).
- 812 25 Cahill, L. & McGaugh, J. L. Mechanisms of emotional arousal and lasting  
813 declarative memory. *Trends in Neurosciences* **21**, 294-299 (1998).
- 814 26 Dudai, Y. Molecular bases of long-term memories: a question of  
815 persistence. *Curr Opin Neurobiol* **12**, 211-216 (2002).
- 816 27 Fischer, S. & Born, J. Anticipated reward enhances offline learning during  
817 sleep. *J Exp Psychol Learn Mem Cogn* **35**, 1586-1593 (2009).
- 818 28 Friedman, J. & Korman, M. Offline Optimization of the Relative Timing of  
819 Movements in a Sequence Is Blocked by Retroactive Behavioral  
820 Interference. *Front Hum Neurosci* **10** (2016).
- 821 29 Korman, M. *et al.* Background matters: Minor vibratory stimulation during  
822 motor skill acquisition selectively reduces off-line memory consolidation.  
823 *Neurobiol Learn Mem* **140**, 27-32 (2017).
- 824 30 Fox, O., Adi-Japha, E. & Karni, A. Motor memory consolidation processes in  
825 young female adults with ADHD may be less susceptible to interference.  
826 *Neurosci Lett* **22**, 30896-30895 (2016).
- 827 31 Coogan, A. N. & McGowan, N. M. A systematic review of circadian function,  
828 chronotype and chronotherapy in attention deficit hyperactivity disorder.  
829 *Atten Defic Hyperact Disord* **7**, 016-0214 (2017).
- 830 32 Gawrilow, C., Stadler, G., Langguth, N., Naumann, A. & Boeck, A. Physical  
831 Activity, Affect, and Cognition in Children With Symptoms of ADHD. *J*  
832 *Atten Disord* **20**, 151-162 (2016).
- 833 33 van der Meere, J. State regulation and attention deficit hyperactivity  
834 disorder. *Attention Deficit Hyperactivity Disorder From genes to patients*,  
835 413-433 (2005).
- 836 34 Johnson, K. A. *et al.* Response variability in attention deficit hyperactivity  
837 disorder: evidence for neuropsychological heterogeneity.  
838 *Neuropsychologia* **45**, 630-638 (2007).

- 839 35 Halperin, J. M. & Schulz, K. P. Revisiting the role of the prefrontal cortex in  
840 the pathophysiology of attention-deficit/hyperactivity disorder. *Psychol*  
841 *Bull* **132**, 560-581 (2006).
- 842 36 Brennan, A. R. & Arnsten, A. F. Neuronal mechanisms underlying attention  
843 deficit hyperactivity disorder: the influence of arousal on prefrontal  
844 cortical function. *Ann N Y Acad Sci*, 007 (2008).
- 845 37 Hegerl, U. & Hensch, T. The vigilance regulation model of affective  
846 disorders and ADHD. *Neurosci Biobehav Rev* **44**, 45-57 (2014).
- 847 38 Yerkes, R. M. & Dodson, J. D. The relation of strength of stimulus to  
848 rapidity of habit-formation. *Journal of Comparative Neurology and*  
849 *Psychology* **18**, 459-482, doi:10.1002/cne.920180503 (1908).
- 850 39 Zentall, S. S. & Zentall, T. R. Optimal stimulation: a model of disordered  
851 activity and performance in normal and deviant children. *Psychol Bull* **94**,  
852 446-471 (1983).
- 853 40 DeFrance, J. F., Smith, S., Schweitzer, F. C., Ginsberg, L. & Sands, S.  
854 Topographical analyses of attention disorders of childhood. *Int J Neurosci*  
855 **87**, 41-61 (1996).
- 856 41 Clarke, A. R., Barry, R. J., McCarthy, R. & Selikowitz, M. EEG-defined  
857 subtypes of children with attention-deficit/hyperactivity disorder. *Clin*  
858 *Neurophysiol* **112**, 2098-2105 (2001).
- 859 42 James, S.-N., Cheung, C. H. M., Rijdsdijk, F., Asherson, P. & Kuntsi, J.  
860 Modifiable Arousal in Attention-Deficit/Hyperactivity Disorder and Its  
861 Etiological Association With Fluctuating Reaction Times. *Biological*  
862 *psychiatry* **1**, 539-547, doi:10.1016/j.bpsc.2016.06.003 (2016).
- 863 43 Wainstein, G. *et al.* Pupil Size Tracks Attentional Performance In  
864 Attention-Deficit/Hyperactivity Disorder. *Sci Rep* **7**, 017-08246 (2017).
- 865 44 Broadbent, D. E. Decision and stress. (1971).
- 866 45 Boman, E., Enmarker, I. & Hygge, S. Strength of noise effects on memory as  
867 a function of noise source and age. *Noise Health* **7**, 11-26 (2005).
- 868 46 Geffner, D., Lucker, J. R. & Koch, W. Evaluation of auditory discrimination  
869 in children with ADD and without ADD. *Child Psychiatry Hum Dev* **26**, 169-  
870 179 (1996).
- 871 47 Zentall, S. S. & Shaw, J. H. Effects of classroom noise on performance and  
872 activity of second-grade hyperactive and control children. *J Educ Psychol*  
873 **72**, 830-840 (1980).
- 874 48 Zentall, S. S. & Meyer, M. J. Self-regulation of stimulation for ADD-H  
875 children during reading and vigilance task performance. *J Abnorm Child*  
876 *Psychol* **15**, 519-536 (1987).
- 877 49 Abikoff, H., Courtney, M. E., Szeibel, P. J. & Koplewicz, H. S. The effects of  
878 auditory stimulation on the arithmetic performance of children with  
879 ADHD and nondisabled children. *J Learn Disabil* **29**, 238-246 (1996).
- 880 50 Baijot, S. *et al.* Neuropsychological and neurophysiological benefits from  
881 white noise in children with and without ADHD. *Behav Brain Funct* **12**,  
882 016-0095 (2016).
- 883 51 Sikstrom, S. & Soderlund, G. Stimulus-dependent dopamine release in  
884 attention-deficit/hyperactivity disorder. *Psychol Rev* **114**, 1047-1075  
885 (2007).

- 886 52 Soderlund, G., Sikstrom, S. & Smart, A. Listen to the noise: noise is  
887 beneficial for cognitive performance in ADHD. *J Child Psychol Psychiatry*  
888 **48**, 840-847 (2007).
- 889 53 Fox, O., Adi-Japha, E. & Karni, A. The effect of a skipped dose (placebo) of  
890 methylphenidate on the learning and retention of a motor skill in  
891 adolescents with Attention Deficit Hyperactivity Disorder. *European*  
892 *Neuropsychopharmacology* **24**, 391-396 (2014).
- 893 54 Hysing, M. *et al.* Sleep and use of electronic devices in adolescence: results  
894 from a large population-based study. *BMJ Open* **5**, doi:10.1136/bmjopen-  
895 2014-006748 (2015).
- 896 55 Cavallera, G. M., Boari, G., Giudici, S. & Ortolano, A. Cognitive parameters  
897 and morning and evening types: two decades of research (1990-2009).  
898 *Percept Mot Skills* **112**, 649-665 (2011).
- 899 56 Arieli, A., Sterkin, A., Grinvald, A. & Aertsen, A. Dynamics of ongoing  
900 activity: explanation of the large variability in evoked cortical responses.  
901 *Science* **273**, 1868-1871 (1996).
- 902 57 Adan, A. Influence of morningness-eveningness preference in the  
903 relationship between body temperature and performance: A diurnal  
904 study. *Personality and Individual Differences* **12**, 1159-1169,  
905 doi:[https://doi.org/10.1016/0191-8869\(91\)90080-U](https://doi.org/10.1016/0191-8869(91)90080-U) (1991).
- 906 58 Poulton, E. C. Increased vigilance with vertical vibration at 5 Hz: an  
907 alerting mechanism. *Appl Ergon* **9**, 73-76 (1978).
- 908 59 Bradley, M. M. & Lang, P. J. Affective reactions to acoustic stimuli.  
909 *Psychophysiology* **37**, 204-215 (2000).
- 910 60 Fellous, J. M. Neuromodulatory basis of emotion. *Neuroscientist* **5**, 283-  
911 294 (1999).
- 912 61 LeDoux, J. E. Emotion circuits in the brain. *Annu Rev Neurosci* **23**, 155-184  
913 (2000).
- 914 62 Schwabe, L., Haddad, L. & Schachinger, H. HPA axis activation by a socially  
915 evaluated cold-pressor test. *Psychoneuroendocrinology* **33**, 890-895  
916 (2008).
- 917 63 Albouy, G., King, B. R., Maquet, P. & Doyon, J. Hippocampus and striatum:  
918 dynamics and interaction during acquisition and sleep-related motor  
919 sequence memory consolidation. *Hippocampus* **23**, 985-1004 (2013).
- 920 64 Rybak, Y. E., McNeely, H. E., Mackenzie, B. E., Jain, U. R. & Levitan, R. D.  
921 Seasonality and circadian preference in adult attention-  
922 deficit/hyperactivity disorder: clinical and neuropsychological correlates.  
923 *Compr Psychiatry* **48**, 562-571 (2007).
- 924 65 Ljungberg, J. K. & Neely, G. Stress, subjective experience and cognitive  
925 performance during exposure to noise and vibration. *Journal of*  
926 *Environmental Psychology* **27**, 44-54,  
927 doi:<http://dx.doi.org/10.1016/j.jenvp.2006.12.003> (2007).
- 928 66 Sandover, J. & Champion, D. F. Some effects of a combined noise and  
929 vibration environment on a mental arithmetic task. *Journal of Sound and*  
930 *Vibration* **95**, 203-212, doi:[http://dx.doi.org/10.1016/0022-](http://dx.doi.org/10.1016/0022-460X(84)90542-X)  
931 [460X\(84\)90542-X](http://dx.doi.org/10.1016/0022-460X(84)90542-X) (1984).
- 932 67 Fuermaier, A. B. *et al.* Good vibrations--effects of whole body vibration on  
933 attention in healthy individuals and individuals with ADHD. *PLoS One* **9**,  
934 e90747 (2014).

- 935 68 Cardinale, M. & Bosco, C. The use of vibration as an exercise intervention.  
936 *Exerc Sport Sci Rev* **31**, 3-7 (2003).
- 937 69 Madou, K. H. & Cronin, J. B. The Effects of Whole Body Vibration on  
938 Physical and Physiological Capability in Special Populations. *Hong Kong*  
939 *Physiotherapy Journal* **26**, 24-38, doi:[http://dx.doi.org/10.1016/S1013-](http://dx.doi.org/10.1016/S1013-7025(09)70005-3)  
940 [7025\(09\)70005-3](http://dx.doi.org/10.1016/S1013-7025(09)70005-3) (2008).
- 941 70 Faul, F., Erdfelder, E., Lang, A. G. & Buchner, A. G\*Power 3: a flexible  
942 statistical power analysis program for the social, behavioral, and  
943 biomedical sciences. *Behav Res Methods* **39**, 175-191 (2007).
- 944 71 Kessler, R. C. *et al.* The prevalence and correlates of adult ADHD in the  
945 United States: results from the National Comorbidity Survey Replication.  
946 *Am J Psychiatry* **163**, 716-723 (2006).
- 947 72 Curcio, G. *et al.* Validity of the Italian version of the Pittsburgh Sleep  
948 Quality Index (PSQI). *Neurol Sci* **34**, 511-519 (2013).
- 949 73 Horne, J. A. & Ostberg, O. A self-assessment questionnaire to determine  
950 morningness-eveningness in human circadian rhythms. *Int J Chronobiol* **4**,  
951 97-110 (1976).  
952  
953
